# Supplementary material for: Effects of sodium hydroxide on the yield and electrochemical performance of sulfonated poly(ether-ether-ketone) functionalized graphene
Source: Royal Society of Chemistry journal article supplement (doi:10.1039/c3ta11014a), 2013-01-01
Supplement: c3ta11014a.pdf [file c3ta11014a.pdf]

## Effects of sodium hydroxide on the yield and electrochemical performance of sulfonated poly(ether-ether-ketone) functionalized graphene

Tapas Kuila,<sup>a,b</sup> Partha Khanra,<sup>a</sup> Nam Hoon Kim,<sup>c</sup> and Joong Hee Lee<sup>a,c</sup>

<sup>a</sup>WCU Program, Department of BIN Fusion Technology, Chonbuk National University, Jeonju, Jeonbuk, 561-756, Republic of Korea, Fax:+82 63 270 2341; Tel: +82 63 270 2342.

<sup>b</sup>Surface Engineering & Tribology Division, CSIR-Central Mechanical Engineering Research Institute, Council of Scientific & Industrial Research (CSIR), Mahatma Gandhi Avenue, Durgapur -713209, India Fax: +91-343-2548204; Tel: +919474729574.

<sup>c</sup> Department of Hydrogen and Fuel Cell Engineering, Chonbuk National University, Jeonju, Jeonbuk, 561-756, Republic of Korea, Fax:+82 63 270 2341; Tel: +82 63 270 2342.

\* Correspondence to: Prof Joong Hee Lee ([jhl@jbnu.ac.kr](mailto:jhl@jbnu.ac.kr))

The mass ratios of SPG1 and SPG2 that collected after centrifugation with respect to the mass of the graphite anode was as follows:

(a) The corroded mass of graphite anode in the case of SPG1 = The masses of collected SPG1 after 10 hours exfoliation (without centrifugation) = 427 mg

(b) The mass of the SPG1 that collected after centrifugation = The masses of collected SPG1 after 10 hours exfoliation followed by centrifugation = 26 mg

(c) The corroded mass of graphite anode in the case of SPG2 = The masses of collected SPG2 after 10 hours exfoliation (without centrifugation) = 972 mg

(d) The mass of the SPG2 that collected after centrifugation = The masses of collected SPG2 after 10 hours exfoliation followed by centrifugation = 390 mg

Charge required for graphite exfoliation can be calculated using the equation,  $Q = \text{Current (Amp)} \times \text{time (sec)}$ .

(e) The charge required for the production of 26 mg SPG1 in 10 h =  $11 \times 10^{-3} \times 3600 \times 10 = 396$  Coulomb

Thus, for the production of 1 g SPG1, charge required = 15230 Coulomb

(f) The charge needed for the production of 390 mg SPG2 in 10 h =  $27 \times 10^{-3} \times 3600 \times 10 = 972$   
Coulomb

Therefore, the charge required for the production of 1 g SPG2 = 2505 Coulomb

The mass ratios of SPG1 and SPG2 collected after centrifugation, SPG2/SPG1 = 15.00

The production yield = (Corroded mass of graphite rod/the mass of the functionalized graphene collected after centrifugation)  $\times 100$ .

Thus, the production yield for SPG1 =  $(26/427) \times 100 = 6.08\%$

In case of SPG2, it is =  $(390/972) \times 100 = 40.12\%$
